# Supplementary material for: Prevalence of chronic kidney disease in population-based studies: Systematic review
Source: Springer Nature journal article supplement (doi:10.1186/1471-2458-8-117), 2008-04-11
Supplement: 12889_2007_1087_MOESM1_ESM.pdf [file 12889_2007_1087_MOESM1_ESM.pdf]

Potentially relevant publications  
identified and screened (n=71)

Reason for exclusion:  
No original data (n=5)  
Not a population based study (n=8)  
Data presented in other article (n=9)

Articles retrieved for more  
detailed evaluation (n=49)

Reason for exclusion:  
No standard definition of CKD  
(n=23)

Studies included (N=26)
