# Supplementary material for: Prevalence of chronic kidney disease in population-based studies: Systematic review
Source: Springer Nature journal article supplement (doi:10.1186/1471-2458-8-117), 2008-04-11

Prevalence

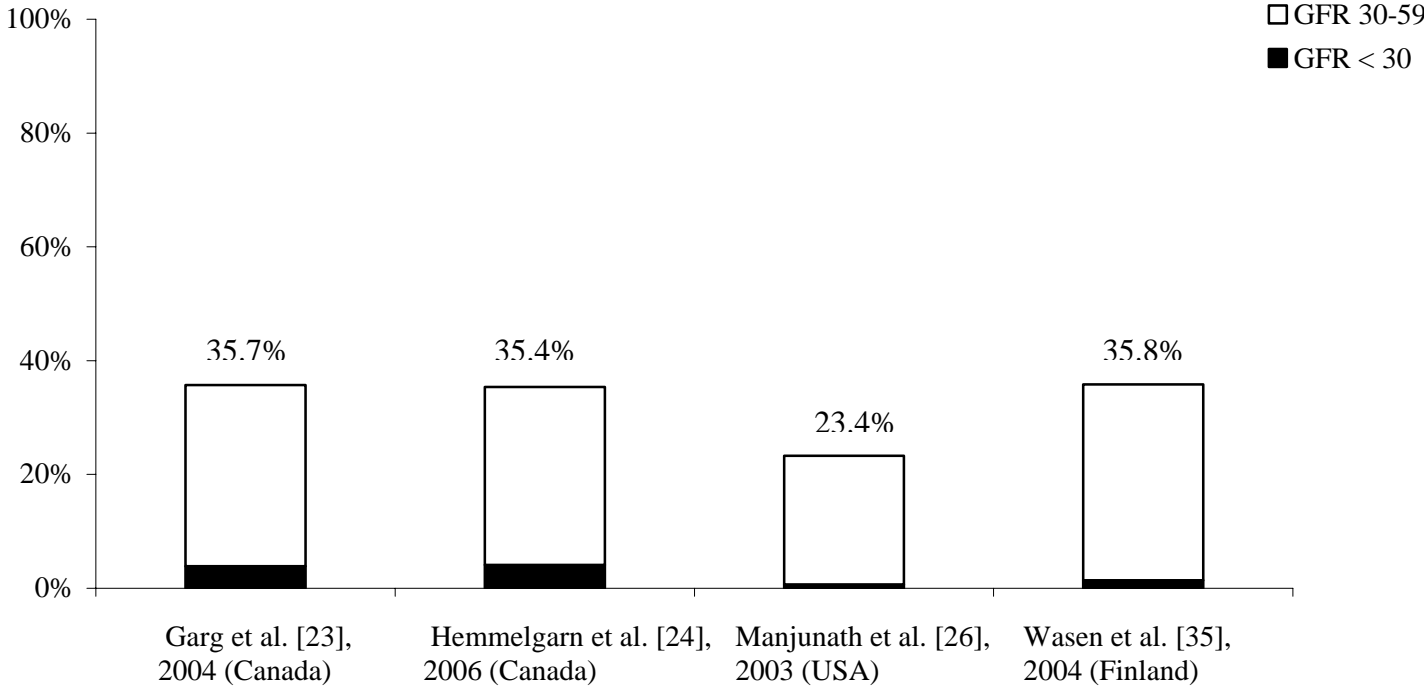

Supplement: 12889_2007_1087_MOESM2_ESM.pdf [file 12889_2007_1087_MOESM2_ESM.pdf]
